# Supplementary material for: Defining the size ranges of polystyrene nanoplastics according to their ability to cross biological barriers
Source: Royal Society of Chemistry journal article supplement (doi:10.1039/d3en00491k), 2023-01-01
Supplement: d3en00491k1.pdf [file d3en00491k1.pdf]

Defining the size ranges of polystyrene nanoplastic according to their ability to cross biological barriers

Xiaoli Zhao<sup>1</sup>, Jiaqi Sun<sup>2</sup>, Lingfeng Zhou<sup>1</sup>, Miaomiao Teng<sup>1\*</sup>, Lihui Zhao<sup>1</sup>, Yunxia Li<sup>1</sup>, Fengchang Wu<sup>1\*</sup>

1. State Key Laboratory of Environmental Criteria and Risk Assessment, Chinese Research Academy of Environmental Sciences, Beijing 100012, China

2. School of Energy and Environmental Engineering, University of Science and Technology Beijing, Beijing 100083, China

\*Corresponding Authors:

Fengchang Wu

E-mail: wufengchang@vip.skleg.cn

Xiaoli Zhao

E-mail: zhaoxiaoli\_zxl@126.com

State Key Laboratory of Environmental Criteria and Risk Assessment, Chinese Research Academy of Environmental Sciences, Beijing 100012, China

Address: Anwai Dayang Fang 8#, Chaoyang District, Beijing, China

**Table S1. Adverse effects of different sizes of nanoplastics on biological barriers**

| Biological barriers        | Species | Plastic type           | Particle size / Exposure concentration dose                                   | Effects                                                                                                                                                                     | References          |
|----------------------------|---------|------------------------|-------------------------------------------------------------------------------|-----------------------------------------------------------------------------------------------------------------------------------------------------------------------------|---------------------|
| <b>Blood–brain barrier</b> | Mice    | Polystyrene particles  | 80, 100, 200 nm, 10 µg/ml                                                     | 80 nm particles can be inhaled through the nasal cavity via atomization and then deposited into the brain, 100 nm and 200 nm particles cannot pass the blood–brain barrier. | (Liu et al. 2022b)  |
|                            |         | Polystyrene particles  | 50 µm, 100 and 1000 µg/L                                                      | Do not pass the intestinal barrier, decrease the secretion of mucin in the mouse gut.                                                                                       | (Lu et al. 2018)    |
| <b>Intestinal barrier</b>  | Mice    | Polystyrene particles  | 5 µm, 100 and 1000 µg/L                                                       | Detected in the intestinal tract, impact of exposure of offspring to maternal microplastics is related to particle size.                                                    | (Luo et al. 2019)   |
|                            |         | Polystyrene particles  | 1, 4 and 10 µm, $4.55 \times 10^7$ particles and $1.49 \times 10^6$ particles | Mice not observed to have inflammation nor oxidative stress.                                                                                                                | (Stock et al. 2019) |
|                            |         | Polyethylene particles | 10-150 µm, 6, 60 and 600 µg/day                                               | Increases intestinal microbial alpha and beta diversity; intestinal inflammation is observed; does not cross the intestinal barrier.                                        | (Li et al. 2020)    |

|                                                        |      |                          |                                                         |                                                                                                                                                                                                                                                                                                                                                                  |                       |
|--------------------------------------------------------|------|--------------------------|---------------------------------------------------------|------------------------------------------------------------------------------------------------------------------------------------------------------------------------------------------------------------------------------------------------------------------------------------------------------------------------------------------------------------------|-----------------------|
| <b>Placental<br/>and blood-<br/>testis<br/>barrier</b> |      | Polystyrene<br>particles | 5 $\mu\text{m}$ ,<br>500 $\mu\text{g/L}$                | Intestinal immune<br>imbalance increases<br>the accumulation and<br>adverse effects of<br>polystyrene<br>microplastics in the<br>intestine.                                                                                                                                                                                                                      | (Liu et al.<br>2022a) |
|                                                        | Mice | Polystyrene<br>particles | 0.8 $\mu\text{m}$ ,<br>30 mg/ kg body<br>weight/d       | Polystyrene<br>microplastics<br>exposure increases<br>the IL-6 level and<br>decreases the<br>malondialdehyde<br>level in mouse<br>ovaries; particles<br>cannot enter the<br>placental barrier.<br>Polystyrene<br>microplastics<br>exposure<br>significantly reduces<br>the<br>number of viable<br>epididymis sperm,<br>increases the rate of<br>sperm deformity. | (Liu et al.<br>2022c) |
|                                                        | Mice | Polystyrene<br>particles | 5 $\mu\text{m}$ ,<br>$10^5$ , $10^6$ and $10^7$<br>ng/L | Polystyrene<br>microplastics<br>exposure results in no<br>significant change in<br>body weight, cannot<br>pass the blood-testis<br>barrier.                                                                                                                                                                                                                      | (Hou et al.<br>2021)  |

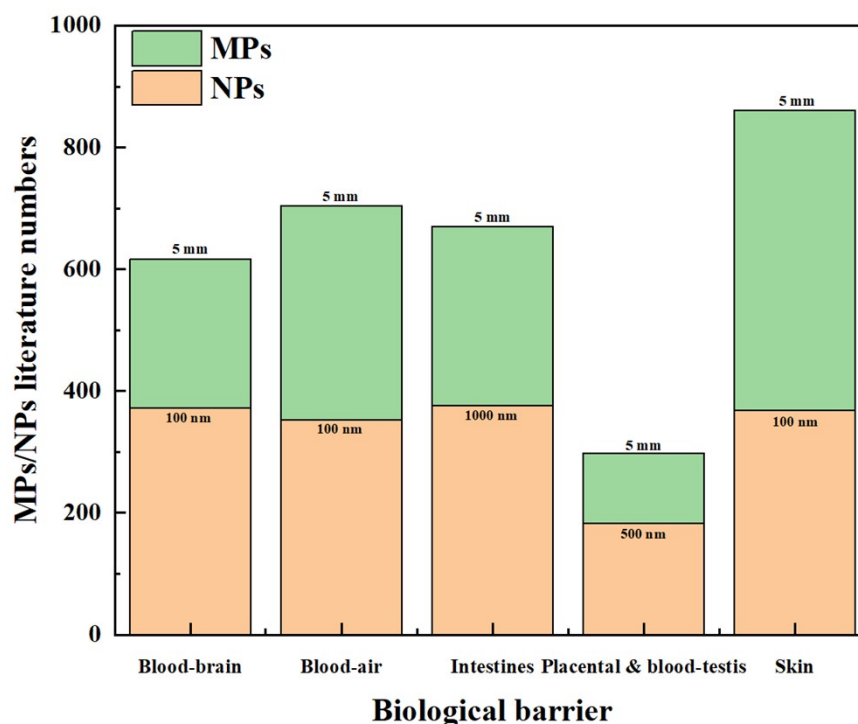

Figure S1. Defining the ecotoxicity ranges of different nanoplastic particle sizes on biological barriers according to the literature. The numbers of studies on MPs/NPs from 2005 to 2023 are summarized. Orange bars represent the number of studies on the definition of nanoplastic particle size that passes through biological barriers, as discussed **in the conclusion**. Green bars represent the number of studies on microplastics measuring less than 5 mm, excluding nanoplastics that can pass through biological barriers. MPs: microplastics, NPs: nanoplastics.

## References

- Hou, B., Wang, F., Liu, T. and Wang, Z. (2021) Reproductive toxicity of polystyrene microplastics: In vivo experimental study on testicular toxicity in mice. *Journal of hazardous materials* 405, 124028.
- Li, B., Ding, Y., Cheng, X., Sheng, D., Xu, Z., Rong, Q., Wu, Y., Zhao, H., Ji, X. and Zhang, Y. (2020) Polyethylene microplastics affect the distribution of gut microbiota and inflammation development in mice. *Chemosphere* 244, 125492.
- Liu, S., Li, H., Wang, J., Wu, B. and Guo, X. (2022a) Polystyrene microplastics aggravate inflammatory damage in mice with intestinal immune imbalance. *Science of the Total Environment* 833, 155198.
- Liu, X., Zhao, Y., Dou, J., Hou, Q., Cheng, J. and Jiang, X. (2022b) Bioeffects of Inhaled Nanoplastics on Neurons and Alteration of Animal Behaviors through Deposition in the Brain. *Nano letters* 22(3), 1091-1099.
- Liu, Z., Zhuan, Q., Zhang, L., Meng, L., Fu, X. and Hou, Y. (2022c) Polystyrene microplastics induced female reproductive toxicity in mice. *Journal of hazardous materials* 424, 127629.
- Lu, L., Wan, Z., Luo, T., Fu, Z. and Jin, Y. (2018) Polystyrene microplastics induce gut microbiota dysbiosis and hepatic lipid metabolism disorder in mice. *Science of The Total Environment* 631-632, 449-458.
- Luo, T., Zhang, Y., Wang, C., Wang, X., Zhou, J., Shen, M., Zhao, Y., Fu, Z. and Jin, Y. (2019) Maternal

exposure to different sizes of polystyrene microplastics during gestation causes metabolic disorders in their offspring. *Environmental Pollution* 255, 113122.

Stock, V., Böhmert, L., Lisicki, E., Block, R., Cara-Carmona, J., Pack, L.K., Selb, R., Lichtenstein, D., Voss, L., Henderson, C.J., Zabinsky, E., Sieg, H., Braeuning, A. and Lampen, A. (2019) Uptake and effects of orally ingested polystyrene microplastic particles in vitro and in vivo. *Archives of Toxicology* 93(7), 1817-1833.
